# Supplementary material for: How does the conformational landscape change on substitution in tetralin? A computational investigation with oxygen, sulphur and selenium
Source: Research Square preprint supplement (doi:10.21203/rs.3.rs-6622869/v1), 2025-05-23
Supplement: Supplementary file 1 [file 37a599927d38e50e96913ef9.docx]

**Supplementary Material**

**How does the conformational landscape change on substitution in tetralin? A computational investigation with oxygen, sulphur and selenium**

Asif Iqubal Middya and Abhijit Chakraborty

Department of Physics, University of Burdwan, Golapbag Campus, 713104, Burdwan, West Bengal,India

* E-mail : [achakraborty.buphys@gmail.com](mailto:achakraborty.buphys@gmail.com), [achakraborty@phys.buruniv.ac.in](mailto:achakraborty@phys.buruniv.ac.in)

**List of Tables and Figures**

**Tables:**

**Table T1**. Geometrical parameters of the optimized “twisted” configuration of isochroman in S0. Computations are done at M06-2X/6-311G ++ (2d,3p) level.

**Table T2**. Geometrical parameters of the optimized configurations of isothiochroman in S0. Computations are done at M06-2X/6-311G ++ (2d,3p) level.

**Table T3.** Geometrical parameters of the optimized configurations of isoselenochroman in S0. Computations are done at M06-2X/6-311G ++ (2d,3p) level.

**Table T4. :**Computed frequencies (cm-1) of the two conformers of isothiochroman in S0 state and its assignments with PED analysis. Computations are performed at M06-2X/6-311G++(2d,3p) level of theory

**Table T5.** Computed frequencies (cm-1) of isochroman in S0 state and its assignments with PED analysis. Computations are performed at M06-2X/6-311G++(2d,3p) level of theory.

**Table T6.** Computed frequencies (cm-1) of the two conformers of isoselenochroman in S0 state and its assignments with PED analysis. Computations are performed at M06-2X/6-311G++(2d,3p) level of theory

**Figures :**

**Figure F1.** Comparison of observed and computed frequencies of isochroman. The observed frequencies are taken from Raman Spectrum of Ref. [32] of the main manuscript. The computations are performed at M06-2X/6-311 G++(2d,3p) level of theory

**Figure F2.** Different conformers and transition states (TS) along with their relative energies of isoselenochroman. Computations are performed at M06-2X/6-311G++(2d,3p) level of theory in the Ground State of the respective molecules.

**Table T1**. Geometrical parameters of the optimized “twisted” configuration of isochroman. Computations are done at M06-2X/6-311G ++ (2d,3p) level.


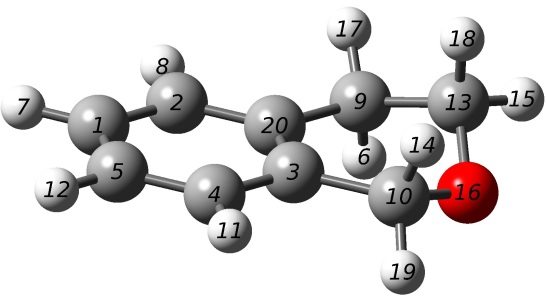


---------------------------------------------------------------------

Atom Atomic Coordinates (Angstroms)

Number Number X Y Z

---------------------------------------------------------------------

1 6 -2.536576 0.692940 0.000000

2 6 -1.338041 1.386738 -0.046143

3 6 -0.113935 -0.679644 -0.004850

4 6 -1.319250 -1.374207 0.044753

5 6 -2.527700 -0.697010 0.046234

6 1 1.381418 1.791892 -1.126452

7 1 -3.473805 1.231135 0.001430

8 1 -1.341321 2.469107 -0.078186

9 6 1.190798 1.463690 -0.102628

10 6 1.193043 -1.438840 0.014663

11 1 -1.306208 -2.456947 0.077221

12 1 -3.457460 -1.246954 0.080019

13 6 2.333402 0.568670 0.348066

14 1 1.357226 -1.852382 1.018495

15 1 3.300087 1.022992 0.144037

16 8 2.300421 -0.653844 -0.361495

17 1 1.140520 2.356563 0.521860

18 1 2.263332 0.374054 1.425266

19 1 1.152254 -2.272055 -0.685029

20 6 -0.118310 0.713221 -0.047878

--------------------------------------------------------------------

**Table T2** Geometrical parameters of the optimized configurations of isothiochroman. Computations are done at M06-2X / 6-311G ++ (2d,3p) level.

(a) Bent


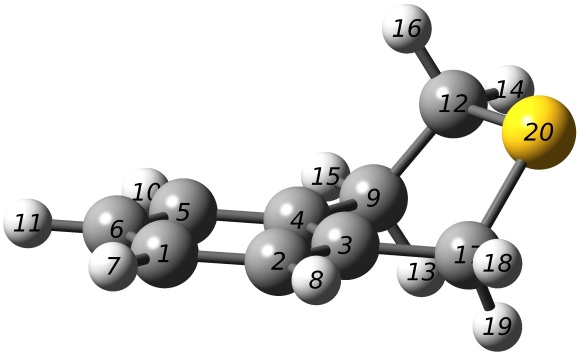


Atom Atomic Coordinates (Angstroms)

Number Number X Y Z

---------------------------------------------------------------------

1 6 2.694982 -0.832073 -0.287858

2 6 1.476890 -1.434534 -0.000319

3 6 0.363058 -0.660598 0.301132

4 6 0.465480 0.734015 0.300794

5 6 1.685045 1.329360 0.005630

6 6 2.800198 0.551619 -0.281822

7 1 3.557443 -1.440992 -0.519264

8 1 1.390217 -2.513228 -0.007676

9 6 -0.783167 1.527888 0.563522

10 1 1.762139 2.409033 -0.000788

11 1 3.745298 1.025513 -0.505907

12 6 -1.879952 1.166879 -0.442275

13 1 -1.152903 1.336382 1.573723

14 1 -2.788501 1.724901 -0.230923

15 1 -0.573639 2.594960 0.492815

16 1 -1.546587 1.406980 -1.449315

17 6 -0.963239 -1.265492 0.641919

18 1 -0.963459 -2.339855 0.477879

19 1 -1.213617 -1.083220 1.686282

20 16 -2.324429 -0.610141 -0.397974

--------------------------------------------------------------------

(b) Twisted


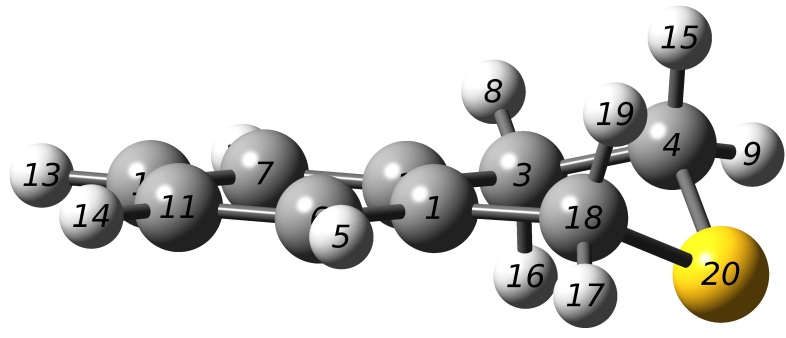


---------------------------------------------------------------------

Atom Atomic Coordinates (Angstroms)

Number Number X Y Z

---------------------------------------------------------------------

1 6 -0.370875 -0.652521 0.093753

2 6 -0.451761 0.738537 -0.004926

3 6 0.759750 1.645528 -0.042521

4 6 2.045132 1.018976 0.465101

5 1 -1.477238 -2.482120 0.165401

6 6 -1.546688 -1.403974 0.090729

7 6 -1.710941 1.331222 -0.103256

8 1 0.541120 2.540052 0.544969

9 1 2.895681 1.668992 0.276087

10 6 -2.872334 0.578832 -0.106676

11 6 -2.789696 -0.804323 -0.009464

12 1 -1.772209 2.409971 -0.178595

13 1 -3.833608 1.066476 -0.185195

14 1 -3.684995 -1.409554 -0.014262

15 1 2.000269 0.817165 1.535202

16 1 0.913772 1.974282 -1.072319

17 1 0.880643 -2.350203 -0.277329

18 6 0.930540 -1.401537 0.252863

19 1 1.109909 -1.622634 1.305984

20 16 2.386235 -0.539875 -0.399274

--------------------------------------------------------------------

**Table T3.** Geometrical parameters of the optimized configurations of isoselenochroman. Computations are done at M06-2X/6-311G ++ (2d,3p) level.

1. Bent


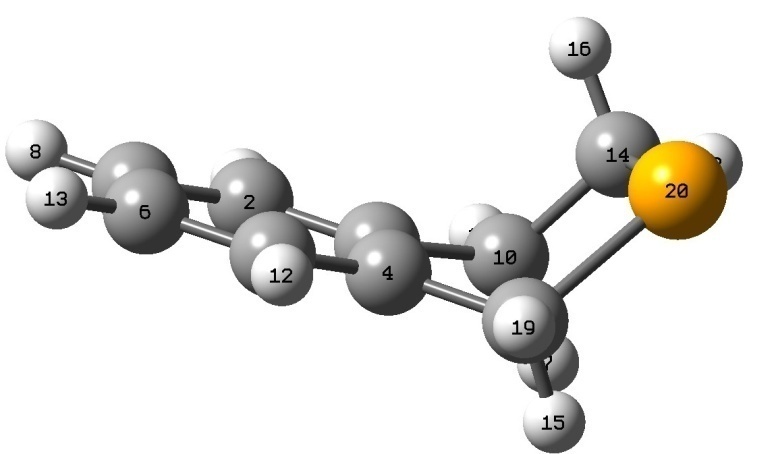


---------------------------------------------------------------------

Atom Atomic Coordinates (Angstroms)

Number Number X Y Z

---------------------------------------------------------------------

1 6 -3.272135 0.371928 0.395493

2 6 -2.246657 1.248271 0.062443

3 6 -1.004089 0.770308 -0.334721

4 6 -0.787129 -0.611615 -0.394579

5 1 -1.812557 -1.483980 -0.047411

6 6 -3.053173 -0.997218 0.343033

7 6 0.502347 1.531604 -1.661061

8 1 -4.234775 0.757458 0.699754

9 1 -2.411751 2.316843 0.113024

10 6 0.143391 1.692205 -0.641964

11 6 0.550488 -1.109365 -0.837578

12 1 -1.638191 -2.551259 -0.087052

13 1 -3.843964 -1.685063 0.606516

14 1 1.307227 1.484736 0.331134

15 1 0.754993 -0.842120 -1.871330

16 1 0.983447 1.673728 1.350391

17 1 -0.187850 2.728877 -0.577096

18 6 2.134579 2.144377 0.088300

19 1 0.632983 -2.187061 -0.734513

20 34 2.010470 -0.355265 0.259352

--------------------------------------------------------------------

b) Twisted


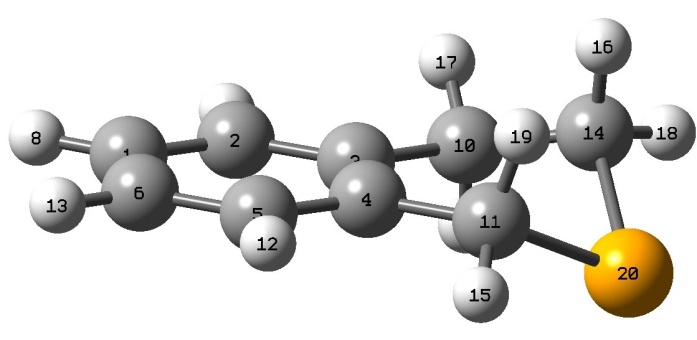


---------------------------------------------------------------------

Atom Atomic Coordinates (Angstroms)

Number Number X Y Z

---------------------------------------------------------------------

1 6 -3.371800 0.425467 -0.222882

2 6 -2.268258 1.258687 -0.170639

3 6 -0.977550 0.767972 0.037179

4 6 -0.804592 -0.612200 0.197037

5 1 -1.925436 -1.444554 0.141797

6 6 -3.198624 -0.943238 -0.065247

7 6 0.319528 2.108560 -0.991653

8 1 -4.356711 0.839121 -0.386278

9 1 -2.400114 2.326422 -0.295331

10 6 0.150036 1.784862 0.036810

11 6 0.524852 -1.278124 0.466670

12 1 -1.785894 -2.511380 0.262748

13 1 -4.045478 -1.613267 -0.106002

14 1 1.466535 1.312914 0.623022

15 1 0.537092 -2.274244 0.033268

16 1 1.384058 1.090446 1.685147

17 1 -0.188700 2.663799 0.590542

18 6 2.245492 2.057293 0.486637

19 1 0.696715 -1.378658 1.537398

20 34 2.059501 -0.321730 -0.267028

--------------------------------------------------------------------

**Table T4. :** Computed frequencies (cm-1) of the two conformers of isothiochroman and its assignments with PED analysis. Computations are performed at M06-2X/6-311G++(2d,3p) level of theory

| Mode | TWISTED | BENT | Assignmentsa |
| --- | --- | --- | --- |
| 1(ν54) | 125 | 76 | τ (CCCC)R1 (31) + τ(SCCC)R1 (33)  τ(CCCC)R1 (11)+ τ(SCCC)R1 (50) |
| 2(ν53) | 172 | 122 | τ (CCCC) R1 and R2 (53) +λ(CCCC) (12)  τ(CCCC)R1&R2(21)+ λ(CCCC) (17)+ τ(SCCC)R1 (12) |
| 3(ν52) | 301 | 190 | τ(HCSC)R1 (17) + λ(CCCC)(31) +τ(SCCC) (14)  λ(CCCC) (14)+ τ(CCCC)R1&R2 (18) |
| 4(ν51) | 317 | 316 | δ(CCC) (12) +τ(HCCC) (21) + τ(CCCC) (31)  ϒ(CCC)R2 (20) + τ(HCSC)R1 (12)+ τ(CCCC)R2 (20) |
| 5(ν50) | 349 | 349 | δ(CCC) R1 and R2 (66) + δ(SCC) R1 (14)  δ(CCC)R1 (10)+ δ(CCC)R1 (19)+ δ(SCC)R1 (20)+ |
| 6(ν49) | 377 | 363 | ν(SC) (25) + δ (CCC) (25) + δ(SCC) (14)  δ(CCC)R1 (29) +ϒ(CCC)R2(17) + τ(CCCC)R1 (14) |
| 7(ν48) | 464 | 422 | ν(CC) (14) + δ (CCC)(36)  δ(CCC) R1&R2 (15) +δ(SCC) R1 (22)+ τ(CCCC)R1 (17) |
| 8(ν47) | 503 | 478 | τ (CCCC) (30) + ϒ (CCCC) (35)  δ(CCC)R1 (16)+ τ(CCCC)R1&R2 (38) |
| 9(ν46) | 563 | 510 | τ (HCCC) (10) + τ (CCCC) (30)  δ(CCC)R1 (26) + τ(CCCC)R1(15) |
| 10(ν45) | 622 | 588 | ν(CC) (10) +δ (CCC) (25)  δ(CCC)R2 (12) + δ(CCC)R1 (10) + τ(CCCC)R1 (14) |
| 11(ν44) | 648 | 607 | δ(CCC) (34) + δ (SCC) (20)  τ(CCCC)R1 (10) + δ(CCC)R1 (12)+ δ(CCC)R2 (14) |
| 12(ν43) | 734 | 674 | δ (CCC) (27) + τ(CCCC) (13)  ν(SC)(57) |
| 13(ν42) | 763 | 729 | δ(CCC) (29) + τ(CCCC)R2 (16)  δ(CCC)R1 (13) + τ(CCCC)R1&R2 (21) |
| 14(ν41) | 797 | 765 | τ(CCCC)R2 (54)  ν(CC)R1&R2 (63)+δ(CCC) R1(28) |
| 15(ν40) | 825 | 777 | ν(SC) R1 (41)  τ(HCCC)R1 (50)+τ(CCCC)R1(14) |
| 16(ν39) | 871 | 789 | τ(HCCC)R1 & R2 (77)  τ(HCCC)R1 (27) + τ(CCCC)R2 (15)+ ν(CCC)R1 (10) |
| 17(ν38) | 897 | 836 | ν(CC) (19) + δ(CCC) (20) + τ(HCCC) (14)  ν(CC)R2(18) + δ(CCC)R1(19)+τ(HCCC)R1 (22) |
| 18(ν37) | 958 | 875 | δ(HCS)(18) +τ(HCCC) (37)  δ(HCS)R1(15)+ ϒ(HCCC)R1(17)+τ(HCSC)R1(18) |
| 19(ν36) | 1004 | 908 | τ(HCCC)R1 & R2 (86)  τ(HCCC)R2 (63) |
| 20(ν35) | 1016 | 939 | ϒ(CCC)R2 (13) + τ(HCSC)R1 (13) + τ(HCCC)R1 (13)  ϒ(CCC)R2 (26) + τ(HCSC)R1 (14) + τ(HCCC)R1 (13) |
| 21(ν34) | 1066 | 972 | ν(CC) (58)  νas(CC)R1 (12)+ τ1(HCCC)R1 (36)+ τ2(HCCC)R1 (16) |
| 22(ν33) | 1097 | 983 | τ(HCCC)R1 (64)  νs(CC)R2 (18)+ τ(HCCC)R1 (42) |
| 23(ν32) | 1119 | 1017 | ν(CC) (36)  τ(HCCC)R2 (72) + τ(HCCC)R2 (11) |
| 24(ν31) | 1125 | 1028 | ν(CC) R1 (19) + τ (HCCC) (24)  ν(CC)R1 (36) + τ(HCCC)R1 (14) |
| 25(ν30) | 1129 | 1076 | τ(HCCC)R1 & R2 (56)  ν(CC)R2 (68) + δ(HCC)R2 (12) |
| 26(ν29) | 1148 | 1129 | ν(CC)R1& R2 (56)  δ(HCC)R2 (32) |
| 27(ν28) | 1210 | 1161 | ν(CC)R2 (16) +δ (HCC) R2 (27) +δ (CCC) R1 (13)  δ(HCC)R1 (23) + δ(HCS)R1 (29) |
| 28(ν27) | 1278 | 1165 | ν(CC)R1 (10) +δ (CCC) R2 (14) + δ(HCS) R1(26)  δ(HCS)R1 (37) |
| 29(ν26) | 1286 | 1182 | ν(CC)R1 (22) +δ (HCC) R2 (13)  δ(HCC)R1 (51) |
| 30(ν25) | 1292 | 1202 | ν(CC)R2 (24) +δ (CCC) R1 (11)  ϒ(HCS)R1 (34) |
| 31(ν24) | 1333 | 1222 | δ(HCS) R1 (43) + τ(HCSC) R1 (15)  ν(CC)R2 (22)+ τ(HCCC)R1 (20) |
| 32(ν23) | 1341 | 1249 | ν(CC)R1 (16)+ δ(HCC)R1 (37) +τ(HCCC)R1 (16)  ν(CC)R2 (14)+ τ(HCSC)R1 (29) |
| 33(ν22) | 1355 | 1269 | δ(HCC)R1 & R2(48)  ν(CC)R2 (16)+ τ(HCCC)R1 (39) |
| 34(ν21) | 1385 | 1316 | τ(HCSC)R1 (28)  τ(HCCC)R1 (32) |
| 35(ν20) | 1452 | 1330 | δ(HCC)R2(29) +δ(HCS)R1(13) + τ(HCCC)R1 (13)  δ(HCC)R2 (54) |
| 36(ν19) | 1468 | 1342 | δ(HCC)R2(13) + τ(HCCC)R1 (41)  δ(HCC)R2 (16) + ν(CC)R2 (43) |
| 37(ν18) | 1520 | 1366 | δ(HCC)R2(15) + τ(HCCC)R1 (53)  δ(HCC)R1 (13) + τ(HCCC)R1 (48) |
| 38(ν17) | 1596 | 1480 | δ(HCH)R1 (27) +δ(HCC)R2(26)  δ(HCH)R1 (64)+ τ(HCSC)R1 (15) |
| 39(ν16) | 1602 | 1498 | δ(HCH)R1 (53) +δ(HCC)R2(13)  δ(HCH)R1 (64) |
| 40(ν15) | 1609 | 1503 | δ(HCH)R1 (73)  δ(HCH)R2 (79) |
| 41(ν14) | 1617 | 1509 | δ(HCH)R1 (82)+ τ(HCCC)R2 (13)  ν(CC)R2 (30)+ δ(HCC)R1 (37) |
| 42(ν13) | 1649 | 1542 | δ(HCC)R1 (55)+ δ(CCC)R1 (17)  δ(HCC)R1 (40) + ν(CC)R2 (11)+ δ(CCC)R1 (24) |
| 43(ν12) | 1735 | 1659 | ν(CC)R2 (37)+ δ(CCC)R2 (30)  ν(CC)R2 (55)+ δ(CCC)R2 (28) |
| 44(ν11) | 1771 | 1685 | ν(CC)R2 (40)+ δ (CCC) R2 (10) + δ(HCC)R2 (23)  ν(CC)R2 (56) |
| 45(ν10) | 3099 | 3051 | ν (CH) R1 (97)  νs (CH)R1 (90) |
| 46(ν9) | 3108 | 3081 | ν (CH) R1 (93)  ν (CH)R1 (90) |
| 47(ν8) | 3114 | 3085 | ν (CH) R1 (93)  ν (CH)R1 (92) |
| 48(ν7) | 3132 | 3106 | ν (CH) R1 (99)  ν (CH)R1 (100) |
| 49(ν6) | 3170 | 3142 | νs (CH) (R1) (98)  νs (CH)R1 (92) |
| 50(ν5) | 3183 | 3143 | νs (CH) (R1) (86)  νs (CH)R1 (94) |
| 51(ν4) | 3231 | 3181 | νas (CH) (R2) (86)  νas (CH) (R2) (92) |
| 52(ν3) | 3235 | 3187 | νas (CH) (R2) (73)  ν (CH) (R2) (97) |
| 53(ν2) | 3258 | 3199 | νas (CH) (R2)(88)  νas (CH) (R2)(83) |
| 54(ν1) | 3275 | 3217 | νs (CH) (R2) (100)  νs (CH) (R2) (89) |

*Calculated with M06-2X with 6-311++G (2d, 3p) basis set

aν: Stretching ; νs: symmetric stretching; νas: asymmetric stretching;δ in-plane bending ; ϒ: out-plane bending ; τ: torsion, λ : Out of plane deformation

R1 – Saturated Ring, R2 – Unsaturated Ring,

**N.B.**The first line (with violet colour) in the PED analysis column of any mode correspond to the Twisted and the last one to the Bent form

**Table T5.:** Computed frequencies (cm-1) of isochroman and its assignments with PED analysis. Computations are performed at M06-2X/6-311G++(2d,3p) level of theory.

| Mode | Observeda | Computed | Assignmentsb |
| --- | --- | --- | --- |
| 1(ν54) | 119 | 103 | τ (HCCC) (10) + τ(COCC) (51) |
| 2(ν53) | 166 | 151 | λ (CCCC) R1 and R2 (24) + τ(CCCC)R1 and R2 (50) |
| 3(ν52) | 269 | 263 | λ (CCCC) R1 and R2 (39) + τ(CCCC)R1 (30) |
| 4(ν51) | 338 | 338 | δ(COC) R1 (27) +δ(CCC) (22) + τ(COCC) R1 (12) |
| 5(ν50) | 347 | 346 | δ(CCC) R1 and R2 (33) + τ(HCCC) R1 (10) |
| 6(ν49) | 427 | 438 | λ(CCCC)R2 (29) +τ(CCCC)R2(32) |
| 7(ν48) | 447 | 447 | δ(CCC) R1&R2 (12) +δ(COC) R1 (26) |
| 8(ν47) | 477 | 476 | ν(CC) R1 (10) + δ(COC) R1 (11) + δ (CCC) R2 (32) + τ (COCC) R1 (13) |
| 9(ν46) | 511 | 518 | λ (CCCC) R2 (24) + τ (CCCC) R2 (32) |
| 10(ν45) | 594 | 598 | ν(CC) R2 (11) +δ (CCC) (35) |
| 11(ν44) | 654 | 657 | δ(CCC) R2 (61) |
| 12(ν43) | 715 | 733 | λ (CCCC) R2 (21) + τ (CCCC) R2 (40) |
| 13(ν42) | 745 | 760 | ν (CC) R2 (20) + δ(CCC) R2 (12) + δ(CCC) R1 (38) |
| 14(ν41) | 760 | **768** | τ (HCCC) R2 (88) |
| 15(ν40) | 829 | 835 | ν(CC) R2(12) + τ(HCCC)R1 (10)+δ(CCC) R2 (24) |
| 16(ν39) | 868 | 887 | τ(HCCC)R1 (45) + δ(CCC)R2 (12) |
| 17(ν38) | 880 | 908 | ν(OC)R1(10) + δ(CCC)R1(23)+ δ(COC)R1(11)+τ(HCCC)R1 (11) |
| 18(ν37) | 950 | 973 | τ(HCCC)R1 & R2 (86) |
| 19(ν36) |  | 974 | ν (OC) R1 (22) + δ (CCC) R2 (13) + τ(HCCC)R1 (19) |
| 20(ν35) |  | 1016 | τ(HCCC)R2 (83) |
| 21(ν34) |  | 1025 | ν(OC)R1 (14) + τ(HCCC)R1 (13) |
| 22(ν33) |  | 1038 | ν(OC)R1 (18)+ δ(COC)R1 (12) |
| 23(ν32) |  | 1075 | ν(CC) (50) + δ (HCC) R1 (11) |
| 24(ν31) |  | 1099 | δ(HCC)R1 (19) + τ(HCCC)R1 (10) |
| 25(ν30) |  | 1146 | δ(HCC)R2 (35) |
| 26(ν29) |  | **1175(S)** | ν (CC) R1 (10) + ν (OC) R1 (15) + δ(HCC)R2 (11) |
| 27(ν28) |  | 1183 | ν(OC) R1 (15) + δ(HCC)R1 & R2 (44) |
| 28(ν27) |  | 1221 | ν(CC)R1 (12) +τ (HCCC) R2 (21) |
| 29(ν26) |  | 1237 | δ(HCC)R1 (27) + δ (HCO) R1 (15) |
| 30(ν25) |  | 1254 | ν (OC) R1 (11) + ν (CC) R1 (15) + δ(HCC)R2 (12) |
| 31(ν24) |  | 1274 | δ (HCO) R1 (53) |
| 32(ν23) |  | 1305 | δ(HCC)R1 & R2(42) |
| 33(ν22) |  | 1323 | ν(CC) R1 (31) + δ(HCO)R1 (27) |
| 34(ν21) |  | 1346 | ν(CC) R2 (14) + δ(HCO)R1 (45) |
| 35(ν20) |  | 1383 | τ(HCCC)R1 (29) + ν(CC)R1 (13) |
| 36(ν19) |  | 1392 | τ(HCCC)R1 (19) + τ(HCOC)R1 (41) |
| 37(ν18) |  | 1428 | δ(HCH)R1 (13) + τ(HCCC)R1 (35) + τ(HCOC)R1 (30) |
| 38(ν17) |  | 1475 | δ(HCH)R1 (88)) |
| 39(ν16) |  | 1498 | δ(HCH)R1 (66) |
| 40(ν15) |  | 1505 | δ(HCH)R1 (11) +δ (HCC) R2 (34) +ν (CC) R2(15) |
| 41(ν14) |  | 1516 | δ(HCH)R1 (56) |
| 42(ν13) |  | 1549 | δ(HCC)R2 (44) + δ(CCC)R2 (18) |
| 43(ν12) |  | 1660 | ν(CC)R2 (44)+ δ(CCC)R2 (31) |
| 44(ν11) |  | 1689 | ν(CC)R2 (56) |
| 45(ν10) |  | 3014 | νs (CH)R1 (90) |
| 46(ν9) |  | 3021 | ν (CH)R1 (90) |
| 47(ν8) |  | 3058 | ν (CH)R1 (92) |
| 48(ν7) |  | 3106 | ν (CH)R1 (100) |
| 49(ν6) |  | 3110 | νs (CH)R1 (92) |
| 50(ν5) |  | 3132 | νs (CH)R1 (94) |
| 51(ν4) |  | 3171 | νas (CH) (R2) (92) |
| 52(ν3) |  | 3176 | ν (CH) (R2) (97) |
| 53(ν2) |  | 3197 | νas (CH) (R2)(99) |
| 54(ν1) |  | 3212 | νs (CH) (R2) (99) |

a  From Reference [32] of the Main Manuscript

bν: Stretching ; νs: symmetric stretching; νas: asymmetric stretching;δ in-plane bending ϒ: out-plane bending ; τ: torsion, λ - Out of plane deformation.

R1 – Saturated Ring, R2 – Unsaturated Ring,

**Table T6:** Computed frequencies (cm-1) of the two conformers of isoselenochroman in S0 state and its assignments with PED analysis. Computations are performed at M06-2X/6-311G++(2d,3p) level of theory

| Mode | TWISTED | BENT | Assignmentsa |
| --- | --- | --- | --- |
| 1(ν54) | 66 | 78 | δ (SeCC)R1 (11) + τ(HCSeC)R1 (11)+ τ(SeCCC)R1 (61)  τ (CCCC)R1 (15) + τ(SeCCC)R1 (37)+ λ(CCCC)R1(20) |
| 2(ν53) | 128 | 126 | τ (CCCC) R1 and R2 (13) + τ (CCCC) R1(14) +λ(CCCC) R1 (17)  δ (CCCC) R1 (23) +λ(CCCC) (29) |
| 3(ν52) | 246 | 180 | δ(CCC) R1 and R2 (13) +λ(CCCC) R2 (16)  τ(CCCC)R1 (18) +τ(SeCCC) (11) |
| 4(ν51) | 247 | 275 | δ(SeCC) R1 (11)+ τ (HCSeC) R1(10)  ν (SeC) R1 (11) +τ(SeCC) (39) + τ(SeCCC) R1(13) |
| 5(ν50) | 269 | 315 | ν (SeC) R1 (11) + τ (CCCC) R1(48)  δ(CCC) R1 and R2 (14) + δ(SCC) R1 (21)+ τ(SeHCC) (16)+ λ(CCCC) (12) |
| 6(ν49) | 304 | 351 | δ(SeCC) R1 (52)  δ (CCC) (32) + δ(CCC) R2 (36) |
| 7(ν48) | 419 | 413 | ν (CC) (11)+ δ(SeCC) R1 (42)  δ (CCC) R2 (21)+ δ (CCC) R2 (10)  +δ (SeCC) R1 (37) |
| 8(ν47) | 445 | 468 | τ (CCCC) R1 (15)+ τ (HCCC) R1 (51)  δ (CCC) R2 (14)+ τ (CCCC) R1 (20)+ λ(CCCC) R1 (13) |
| 9(ν46) | 508 | 510 | τ (CCCC) (24) (R1 and R2) + τ (HCCC) (43)  ν (CC) R1 (10) + δ (CCC) R2 (36)+ τ (HCCC) R2 (10) |
| 10(ν45) | 565 | 572 | δ (CCC) (R2) (12)+ δ (CCC) R2 (34)  ν(CC) R2 (14) +δ (SeCC) R1 (22) |
| 11(ν44) | 594 | 598 | τ (CCCC) R1 (34) + δ (SeCC) R1 (45)  δ(CCC) R2 (30) + δ (SeCC) R1 (36) |
| 12(ν43) | 618 | 608 | δ(CCC) R1 (15)  δ (CCC) R2 (27) + τ(SeCCC) R1 (13)+ δ(CCC) R2 (30) |
| 13(ν42) | 691 | 652 | ν(SeC) R1 (14)+ δ(CCC) (12)  τ(CCCC) R1 (21)+ τ(SeCCC) R2 (14) |
| 14(ν41) | 727 | 756 | δ (CCC) R1 (85)  δ (SeCC) R2 (50) |
| 15(ν40) | 741 | 770 | ν(SeC) R1 (85)+ δ(CCC) R1 (25)+ τ(HCCC) R2 (35)  ν(SeC) R1 (14)+ δ(CCC) (12) |
| 16(ν39) | 769 | 776 | τ(CCCC)R1 & R2 (85)  τ(HCCC)R1 & R2 (61) |
| 17(ν38) | 819 | 829 | ν(CC) R2 (10) + δ(SeCC) R1 (34)  ν(CC)R2(18) + δ(CCC)R1(19)+τ(HCCC)R1 (22) |
| 18(ν37) | 848 | 851 | δ(HCSe) R1 (20) +τ(HCCC) R2 (51)  δ(HCSe)R1(15)+ ϒ(HCCC)R1(17)+τ(HCSeC)R1(18) |
| 19(ν36) | 895 | 901 | τ(HCCC)R1 & R2 (54)  τ(HCCC)R2 (63) |
| 20(ν35) | 907 | 921 | δ(SeCC) R2(30) + τ(HCCC)R1 (14)  ϒ(CCC)R2 (26) + τ(HCSeC)R1 (12) |
| 21(ν34) | 971 | 960 | ν(CC) R1 (18)+ δ(HCSe) R1 (21)  νas(CC)R1 (10)+ τ2(HCCC)R1 (20) |
| 22(ν33) | 987 | 978 | ν(CC) R1 (24)+ τ(SeCCC)R1 (10)  νs(CC)R2 (18)+ τ(HCCC)R1 (42) |
| 23(ν32) | 1016 | 1014 | τ(HCSeC)R1 (70)  τ(HCCC)R2 (72) + τ(HCCC)R2 (11) |
| 24(ν31) | 1039 | 1020 | ν(CC) R1 (54) + τ (SeCCC) (24)  ν(CC)R1 (36) + τ(HCCC)R1 (14) |
| 25(ν30) | 1084 | 1074 | τ(HCCC)R1 & R2 (45)+ ν(CC) R1 (65)  ν(CC)R2 (68) + δ(HCC)R2 (12) |
| 26(ν29) | 1135 | 1119 | νs (CC)R1 (35)  δ(HCC)R2 (30) |
| 27(ν28) | 1163 | 1148 | ν(CC)R2 (25) +δ (HCC) R2 (15) +δ (CCC) R1 (55)  δ(CCC)R1 (23) + δ(HCSe)R1 (35) |
| 28(ν27) | 1182 | 1159 | ν(CC)R1 (10) + δ(HCSe) R1(35)  δ(HCSe)R1 (37)+ ν(CC)R2 (54) |
| 29(ν26) | 1204 | 1181 | ν(CC)R1 (22) +δ (SeCC) R1 (13)  δ(HCC)R1 (51) |
| 30(ν25) | 1213 | 1213 | ν(CC)R2 (24) +δ (SeCC) R1 (25)  ϒ(HCSe)R1 (34) |
| 31(ν24) | 1229 | 1231 | δ(HCSe) R1 (43) + τ(HCSeC) R1 (15)  ν(CC)R2 (22)+ τ(HCCC)R1 (20) |
| 32(ν23) | 1256 | 1258 | ν(CC)R1 (18)+ δ(HCC)R1 (45) +τ(HCCC)R1 (24)  ϒ (HCSe)R1 (16)+τ (HCSeC)R1 (19) |
| 33(ν22) | 1314 | 1297 | δ(HCC)R1 & R2(35)  τ(HCSeC)R1 (18) |
| 34(ν21) | 1325 | 1328 | τ(HCSeC)R1 (35)  τ(HCCC)R1 (15) |
| 35(ν20) | 1326 | 1337 | τ (HCSe)R1(54) + τ(HCCC)R1 (13)  δ(HCC)R2 (14) |
| 36(ν19) | 1388 | 1365 | δ(CCC)R2(13) + τ(HCCC)R1 (41)  δ(HCC)R2 (16) + τ(HCCC)R1 (20)+ τ(HCCC)R1 (22) |
| 37(ν18) | 1465 | 1477 | δ(HCC)R2(16) + τ(SeCCC)R1 (65)  δ(SeCC)R1 (10) + τ(HCCC)R1 (32) |
| 38(ν17) | 1474 | 1493 | δ(HCH)R1 (27) +δ(SeCC)R2(26)  δ(HCH)R1 (46)+ δ(HCH)R1 (19) |
| 39(ν16) | 1483 | 1503 | δ(HCH)R1 (45) +δ(HCC)R2(13)  δ(HCH)R1 (15) |
| 40(ν15) | 1493 | 1506 | δ(HCH)R1 (73)  δ(HCH)R2 (46) |
| 41(ν14) | 1545 | 1539 | δ(HCH)R1 (78)+ τ(SeCCC)R1 (13)  ν(CC)R2 (12)+ δ(HCC)R1 (28)+ δ(HCH)R2 (46) |
| 42(ν13) | 1647 | 1651 | δ(HCC)R1 (55)+ δ(SeCC)R1 (35)  δ(SeCC)R1 (16) + ν(CC)R2 (25)+ δ(SeCC)R1 (12) |
| 43(ν12) | 1674 | 1678 | ν(CC)R2 (37)+ δ(CCC)R1 (28)  ν(CC)R2 (31)+ δ(CCC)R2 (25) |
| 44(ν11) | 3056 | 3062 | ν(CC)R2 (35)+ δ (SeCC) R1 (10) + δ(HCC)R2 (25)  ν(CH)R1 (40)+ ν(CH)R1 (47) |
| 45(ν10) | 3057 | 3105 | ν (CH) R1 (94)  νs (CH)R1 (16)+ νs (CH)R1 (16)+ νs (CH)R1 (90) |
| 46(ν9) | 3089 | 3106 | ν (CH) R1 (92)  ν (CH)R1 (92) |
| 47(ν8) | 3104 | 3116 | ν (CH) R1 (90)  ν (CH)R1 (94) |
| 48(ν7) | 3151 | 3167 | ν (CH) R1 (93)  ν (CH)R1 (100) |
| 49(ν6) | 3163 | 3170 | νs (CH) (R1) (92)  νs (CH)R1 (47)+ ν (CH)R1 (47) |
| 50(ν5) | 3189 | 3197 | νs (CH) (R1) (86)  νs (CH)R1 (92) |
| 51(ν4) | 3293 | 3202 | νas (CH) (R2) (86)  νas (CH) (R2) (89) |
| 52(ν3) | 3214 | 3204 | νas (CH) (R2) (67)  ν (CH) (R2) (99) |
| 53(ν2) | 3224 | 3217 | νas (CH) (R2)(88)  νas (CH) (R2)(89) |
| 54(ν1) | 3228 | 3230 | νs (CH) (R2) (100)  νs (CH) (R2) (95) |

*Calculated with M06-2X with 6-311++G (2d, 3p) basis set

aν: Stretching ; νs: symmetric stretching; νas: asymmetric stretching;δ in-plane bending ; ϒ: out-plane bending ; τ: torsion, λ : Out of plane deformation

R1 – Saturated Ring, R2 – Unsaturated Ring,

**N.B.**The first line (with violet colour) in the PED Analysis Column of any mode correspond to the Twisted Form and the last one to the Bent form


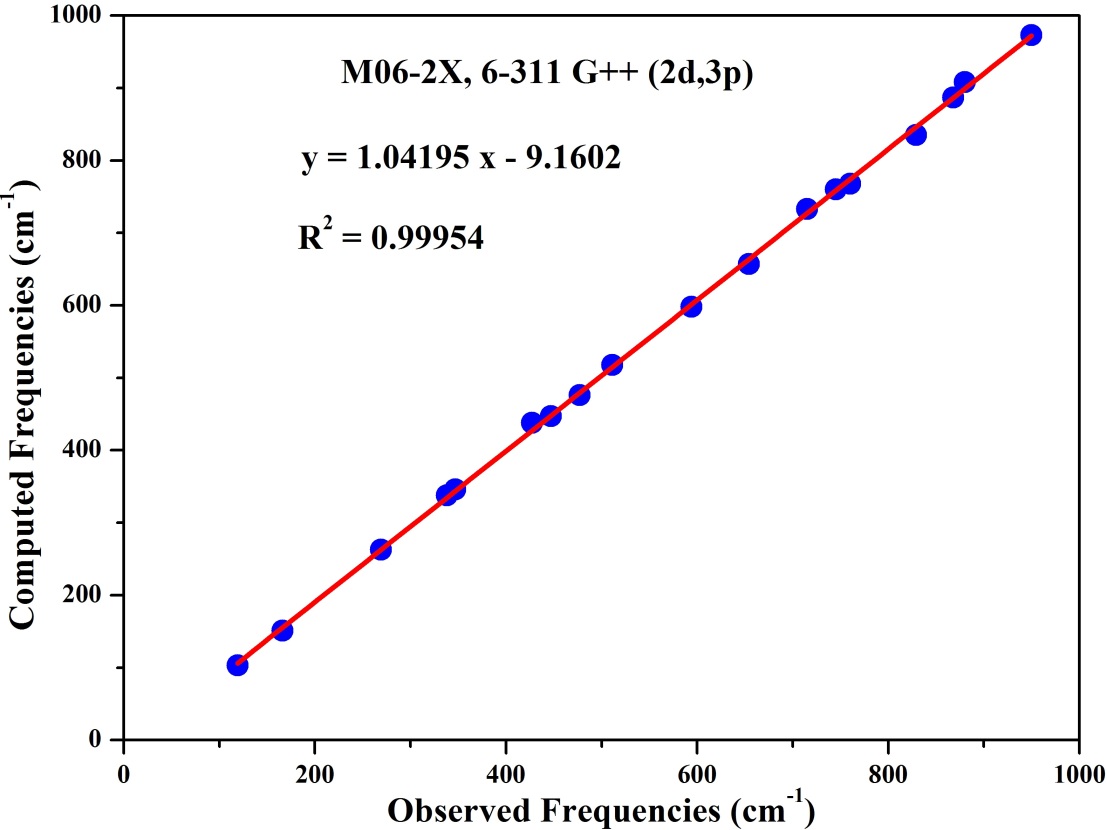


**Fig. F1** Comparison of observed and computed frequencies of isochroman. The observed frequencies are taken from Raman Spectrum of Ref. [32] of the main manuscript. The computations are performed at M06-2X/6-311 G++(2d,3p) level of theory

**Twisted- 700 cm-1**

**TS2 – 550 cm-1**

**Isoselenochroman**

**Bent**

**Planar – 3900 cm-1**

**TS1 – 1600 cm-1**


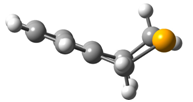

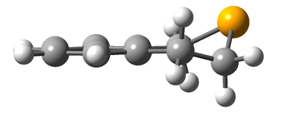

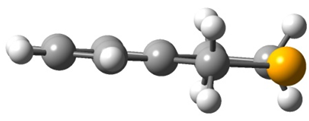

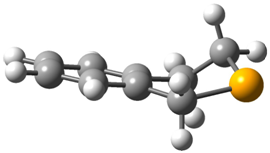

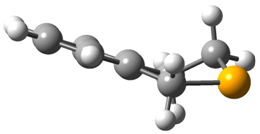


**Fig. F2:** Different conformers and transition states (TS) along with their relative energies of isoselenochroman. Computations are performed at M06-2X/6-311G ++ (2d,3p) level of theory in the Ground State of the respective molecules.
